# Supplementary material
Source: PubMed Central journal article supplement (PMC9991062)

# THE LANCET Oncology

## Supplementary appendix

This appendix formed part of the original submission and has been peer reviewed. We post it as supplied by the authors.

Supplement to: Cortellini A, Tabernero J, Mukherjee U, et al. SARS-CoV-2 omicron (B.1.1.529)-related COVID-19 sequelae in vaccinated and unvaccinated patients with cancer: results from the OnCovid registry. *Lancet Oncol* 2023; published online March 7. [https://doi.org/10.1016/S1470-2045\(23\)00056-6](https://doi.org/10.1016/S1470-2045(23)00056-6).

**SARS-CoV-2 Omicron (B.1.1.529) related sequelae in vaccinated and unvaccinated patients with cancer: results from the OnCovid registry.**

Cortellini A et al.

**Supplementary Files**

|                               |              |
|-------------------------------|--------------|
| <b>Supplementary Methods</b>  | <b>p. 2</b>  |
| <b>Supplementary Table 1</b>  | <b>p. 4</b>  |
| <b>Supplementary Table 2</b>  | <b>p. 5</b>  |
| <b>Supplementary Table 3</b>  | <b>p. 5</b>  |
| <b>Supplementary Table 4</b>  | <b>p. 6</b>  |
| <b>Supplementary Table 5</b>  | <b>p. 6</b>  |
| <b>Supplementary Table 6</b>  | <b>p. 7</b>  |
| <b>Supplementary Table 7</b>  | <b>p. 8</b>  |
| <b>Supplementary Table 8</b>  | <b>p. 8</b>  |
| <b>Supplementary Table 9</b>  | <b>p. 9</b>  |
| <b>Supplementary Table 10</b> | <b>p. 9</b>  |
| <b>Supplementary Table 11</b> | <b>p. 10</b> |
| <b>Supplementary Figure 1</b> | <b>p. 11</b> |
| <b>Supplementary Figure 2</b> | <b>p. 12</b> |

## Supplementary Methods

### Study design and procedures

OnCovid (NCT04393974) is an active European registry study that, since the beginning of the pandemic, has collected consecutive patients fulfilling the following inclusion criteria: 1) age  $\geq 18$  years; 2) diagnosis of SARS-CoV-2 infection confirmed by RT-PCR of a nasopharyngeal swab; 3) history of solid or hematologic malignancy, at any time during the patients' past medical history, either active or in remission at the time of COVID-19 diagnosis. Patients with a history of non-invasive/premalignant lesions or with low malignant potential (i.e., basal cell carcinoma of the skin, non-invasive carcinoma in situ of the cervix, ductal carcinoma in situ) were excluded. For hematologic malignancies, only patients with a history of oncologic diseases with defined malignant behavior (lymphoma, leukaemia, multiple myeloma) were included.

The overarching subgrouping of demographics, oncological and COVID-19 related features has been consistently utilised in all the publications from our registry (Cancer Discov. 2020 Jul 31;10(10):1465–74; Eur J Cancer. 2021 Jun;150:190-202; J Immunother Cancer. 2021 Mar;9(3):e002277; Cancers. 2020 Jul 8;12(7):1841; Lancet Oncol. 2021 Nov 3;S1470-2045(21)00573-8; JAMA Oncol. 2021 Nov 24; J Natl Cancer Inst. 2022 Jul 11; Eur J Cancer. 2022 Jul; Lancet Oncol. 2022 Jul; Eur J Cancer. 2022 Aug) and was made necessary by the wide heterogeneity oncological diagnoses included in the registry.

The following key variables were considered as baseline key demographic and tumour characteristics:

- Country (United Kingdom, Spain, Italy),
- Biological sex (male vs female),
- Age ( $\geq 65$  vs  $< 65$  years),
- Number of co-morbidities (0-1 vs  $\geq 2$ ),
- Tumour stage at COVID-19 (defined as advanced vs non-advanced) at COVID-19. In details, we defined as “advanced” stage any patient with distant metastatic disease, to differentiate them from “non-advanced” patients. Disease-specific criteria (i.e. Rai, Binet criteria etc.) were utilised as appropriate to define advanced haematological malignancies.
- Smoking status at COVID-19 (Never vs ever smokers),
- Primary tumour (clustered as: breast, gastro-intestinal, gynaecological/genito-urinary, thoracic, others, and haematologic),
- Receipt of any systemic anticancer therapy within 4 weeks prior to SARS-CoV-2 infection (yes vs no),

The following surrogates of COVID-19 severity were tested for their association with the prevalence of COVID-19 sequelae:

- Experience of at least one COVID-19 complications including acute respiratory failure, ARDS, kidney injury, secondary infections, sepsis, septic shock, acute cardiac injury, acute liver injury and others (yes vs no);
- Receipt of any COVID-19 oriented therapy, including antivirals, antimalarials, antibiotics, corticosteroids, interleukin-6 inhibitors and others (yes vs no);
- Oxygen therapy requirement (yes vs no);
- Hospitalization requirement (pre-existent/due to COVID-19 vs not required).

Oncological and disease specific variables were collected at baseline, defined at the moment of diagnosis of SARS-CoV-2 by PCR test. Characteristics of severity, complications and therapy

against COVID-19 were collected throughout the observation period until full clinical resolution of COVID-19 or patients' mortality.

Considering the variety of dosing intervals between the first and second vaccination across the participating countries, which prevented a unique definition of complete vaccination starting from the first dose, in the main analysis patients were categorized as fully vaccinated at the time of COVID-19 diagnoses if they had received two doses for the BNT162b2, mRNA-1273, and AZD1222 vaccines or in case the breakthrough infection diagnosis was diagnosed at least 28 days after a single dose of the Ad.26.COV2.S vaccine. Patients who received at least one vaccination, without meeting the above-mentioned criteria, were considered partially vaccinated. Patient observation time started from date of first PCR/SARS-CoV-2 infection confirmation until patient death or loss to follow-up. Being a retrospective, observational study, the entirety of the OnCovid cohort was followed up at intervals dictated by the routine clinical practice in each participating institutions, as deemed clinically indicated by the treating physicians. All-cause of mortality was retrieved and validated by investigators at each centre by accessing patients' electronic medical records and death certificates. Timing of follow-up was not standardized but dictated by the discretion of treating physicians as per standard of care. To avoid incurring into bias, by mislabelling patients that were lost to follow-up as potentially deceased, we decided to exclude all patients with incomplete/missing follow up data to preserve the integrity of our results. Patients were lost to follow-up when for any reason failed to attend planned follow-up appointments scheduled by the treating clinicians. Given the pragmatic nature of this registry, based on standard of care clinical practice, we could not accurately reconstruct the reasons to explain why a proportion of patients did not attend for follow-up

**Supplementary Table 1.** Patient disposition across participating centres. PI: principal Investigator.

| Institution                                                             | Eligible Patients |             | Site PI              |
|-------------------------------------------------------------------------|-------------------|-------------|----------------------|
|                                                                         | N                 | %           |                      |
| Vall d'Hebron University Hospital, Barcelona (Spain)                    | 372               | 19.5        | Josep Taberner       |
| University College London, London (UK)                                  | 251               | 13.1        | Alvin JX Lee         |
| Chelsea and Westminster Hospital, London (UK)                           | 231               | 12.1        | Mark Bower           |
| Ospedale Maggiore della Carità, Novara (Italy)                          | 155               | 8.1         | Alessandra Gennari   |
| Guy's and St Thomas' NHS Foundation Trust, London (UK)                  | 142               | 7.4         | Ailsa Sita-Lumsden   |
| ICO L'Hospitalet, L'Hospitalet de Llobregat, Barcelona (Spain)          | 138               | 7.2         | Ramon Salazar        |
| IRCCS Humanitas Research Hospital, Rozzano - Milan (Italy)              | 125               | 6.5         | Lorenza Rimassa      |
| Policlinico San Matteo, Pavia (Italy)                                   | 75                | 3.9         | Paolo Pedrazzoli     |
| ICO Girona (Spain)                                                      | 73                | 3.8         | Joan Brunet          |
| ICO Badalona (Spain)                                                    | 62                | 3.2         | Andrea Plaja         |
| Imperial College London, London (UK)                                    | 58                | 3.0         | David Pinato         |
| IRCCS AOU San Martino, Genova (Italy)                                   | 54                | 2.8         | Matteo Lambertini    |
| Manresa Hospital (Spain)                                                | 43                | 2.3         | Clara Martinez-Vila  |
| Careggi University Hospital, Florence (Italy)                           | 35                | 1.8         | Francesca Mazzoni    |
| Università Campus Bio-Medico, Rome (Italy)                              | 23                | 1.2         | Bruno Vincenzi       |
| Istituto Europeo di Oncologia, Milano (Italy)                           | 17                | 0.9         | Paola Queirolo       |
| Azienda Ospedaliera S. Andrea, Rome (Italy)                             | 16                | 0.8         | Raffaele Giusti      |
| Istituto Tumori, Milan (Italy)                                          | 14                | 0.7         | Rossella Bertulli    |
| Northumbria Healthcare NHS (UK)                                         | 13                | 0.7         | Avinash Aujayeb      |
| Santa Maria Goretti Hospital, Latina (Italy)                            | 12                | 0.6         | Federica Zoratto     |
| Ospedale Antonio e Biagio e Cesare Arrigo, Alessandria (Italy)          | -                 | -           | Maura Rossi          |
| Ospedali Riuniti di Ancona, Università Politecnica delle Marche (Italy) | -                 | -           | Rossana Berardi      |
| Hospital Clinic, Barcelona (Spain)                                      | -                 | -           | Aleix Prat           |
| University of Bari 'Aldo Moro', Bari (Italy)                            | -                 | -           | Marco Tucci          |
| Ospedale Papa Giovanni XXIII, Bergamo (Italy)                           | -                 | -           | Alberto Zambelli     |
| Azienda Ospedaliera Spedali Civili, Brescia (Italy)                     | -                 | -           | Salvatore Grisanti   |
| Fondazione Poliambulanza Istituto Ospedaliero, Brescia (Italy)          | -                 | -           | Michela Lubertini    |
| Institut Jules Bordet, Brussels (Belgium)                               | -                 | -           | Angela Loizidou      |
| Velindre Cancer Centre, Cardiff (UK)                                    | -                 | -           | Sarah Townsend       |
| Azienda Istituti Ospitalieri di Cremona, Cremona (Italy)                | -                 | -           | Daniele Generali     |
| University of L'Aquila, L'Aquila (Italy)                                | -                 | -           | Alessandro PArisi    |
| Hospital Universitario 12 de Octubre, Madrid (Spain)                    | -                 | -           | Ana Sanchez de Torre |
| University of Munich (Germany)                                          | -                 | -           | Nadia Harbeck        |
| Palma de Mallorca Hospital, Palma de Mallorca, (Spain)                  | -                 | -           | Maria Iglesias       |
| Azienda Ospedaliera S Maria, Terni (Italy)                              | -                 | -           | Sergio Bracarda      |
| Barts Health NHS Trust, London (UK)                                     | -                 | -           | Nikolaos Diamantis   |
| Institut Gustave Roussy, Villejuif (France)                             | -                 | -           | Fanny Pommeret       |
| <b>Total</b>                                                            | <b>1909</b>       | <b>100%</b> |                      |

**Supplementary Table 2.** Rate of overall COVID-19 sequelae across the pre-defined pandemic phases. Unvaccinated (including partially vaccinated) and Vaccinated (including patients who received either a double dose or a booster dose) patients from the Alpha-Delta and Omicron phases are presented separately.

|                                                                          | Overall Population                 |                                    |                                    |                                 |
|--------------------------------------------------------------------------|------------------------------------|------------------------------------|------------------------------------|---------------------------------|
|                                                                          | Overall population<br>(N=1909)     | Prevaccination<br>(N=1000)         | Alpha-Delta<br>(N=653)             | Omicron<br>(N=256)              |
|                                                                          | N (Rate, 95%CI)                    | N (Rate, 95%CI)                    | N (Rate, 95%CI)                    | N (Rate, 95%CI)                 |
| <b>COVID-19 sequelae</b>                                                 | 317<br><b>16.6%</b><br>(14.8-18.5) | 191<br><b>19.1%</b><br>(16.4-22.0) | 110<br><b>16.8%</b><br>(13.8-20.3) | 16<br><b>6.2%</b><br>(3.5-10.2) |
| <i>P-value (comparison)<br/>(Pre-vaccination phase)</i>                  |                                    |                                    | 0.24                               | <0.0001                         |
|                                                                          | Unvaccinated                       |                                    |                                    |                                 |
|                                                                          | Alpha-Delta<br>(N=458)             | Omicron<br>(N=32)                  |                                    |                                 |
|                                                                          | N (Rate, 95%CI)                    | N (Rate, 95%CI)                    |                                    |                                 |
| <b>COVID-19 sequelae</b>                                                 | 84<br><b>18.3%</b><br>(14.6-22.7)  | 3<br><b>9.4%</b><br>(1.9-27.3)     |                                    |                                 |
| <i>P-value (comparison)<br/>(Pre-vaccination phase)</i>                  | 0.73                               | 0.16                               |                                    |                                 |
|                                                                          | Vaccinated                         |                                    |                                    |                                 |
|                                                                          | Alpha-Delta<br>(N=123)             | Omicron<br>(N=196)                 |                                    |                                 |
| <b>COVID-19 sequelae</b>                                                 | 16<br><b>13.0%</b><br>(7.4-21.1)   | 12<br><b>6.1%</b><br>(3.2-10.7)    |                                    |                                 |
| <i>P-value (comparison)<br/>(Alpha-Delta/Omicron phase Unvaccinated)</i> | 0.16                               | 0.49                               |                                    |                                 |

**Supplementary Table 3.** Summary of baseline characteristics' distribution before to and after the propensity score matching between unvaccinated patients from the Omicron phase (32 patients) and patients from the Pre-vaccination phase (1000 patients). Variability of included characteristics is estimate through the standardized mean difference (SMD). SACT: systemic anticancer therapy.

| Unvaccinated patients Omicron<br>(N=32) | Unmatched cohorts<br>32 vs 1000 patients | Matched cohorts<br>30 vs 118 patients |
|-----------------------------------------|------------------------------------------|---------------------------------------|
|                                         | SMD                                      | SMD                                   |
| <b>Country</b>                          |                                          |                                       |
| United Kingdom                          | 0.11                                     | 0.12                                  |
| Spain                                   | -0.09                                    | -0.09                                 |
| Italy                                   | -0.04                                    | -0.05                                 |
| <b>Sex</b>                              |                                          |                                       |
| Age (≥ vs < 65 years)                   | -0.02                                    | -0.02                                 |
| Age (≥ vs < 65 years)                   | -0.05                                    | -0.05                                 |
| <b>Comorbidities</b>                    |                                          |                                       |
| 0.04                                    | 0.04                                     | 0.04                                  |
| <b>Primary Tumour</b>                   |                                          |                                       |
| Breast                                  | 0.07                                     | 0.07                                  |
| Gastrointestinal                        | 0.09                                     | 0.09                                  |
| Gynaecological/Genito-Urinary           | 0.08                                     | 0.04                                  |
| Thoracic                                | -0.04                                    | -0.04                                 |
| Others                                  | 0.03                                     | 0.03                                  |
| Haematological                          | -0.21                                    | -0.21                                 |
| <b>Tumour stage</b>                     |                                          |                                       |
| Non-advanced                            | -0.12                                    | -0.12                                 |
| Advanced                                | -0.09                                    | 0.17                                  |
| Missing                                 | -0.04                                    | -0.09                                 |
| <b>Status at COVID-19 diagnosis</b>     | 0.00                                     | 0.00                                  |
| <b>SACT at COVID-19 diagnosis</b>       |                                          |                                       |
| No                                      | 0.02                                     | 0.02                                  |
| Yes                                     | 0.08                                     | 0.09                                  |
| Missing                                 | -0.13                                    | -0.14                                 |

**Supplementary Table 4.** Propensity score matching fitted multivariable logistic regression model for COVID-19 sequelae comparing unvaccinated patients from the Omicron phase (30 patients) with 118 patients from the pre-vaccination phase. Country, tumour stage, primary tumour, SACT at COVID-19 were included in the multivariable analysis due to their respective SMD at the propensity score matching. \*Clustered robust correction of 95%CI for participating centre. SACT: systemic anticancer therapy; UK: United Kingdom; Unk: unknown; GI: gastro-intestinal; GU: genito-urinary; GY: gynaecological; Unk: unknown; aOR: adjusted odds ratio; CI: confidence intervals.

| COVID-19 sequelae                                              | aOR  | 95%CI |      | 95%CI* |       |
|----------------------------------------------------------------|------|-------|------|--------|-------|
| <b>Pandemic phase: Omicron unvaccinated vs Pre-vaccination</b> | 0.35 | 0.09  | 3.79 | 0.08   | 3.64  |
| <b>Country: Italy vs UK</b>                                    | 0.48 | 0.15  | 1.50 | 0.21   | 1.12  |
| <b>Country: Spain vs UK</b>                                    | 0.45 | 0.10  | 2.07 | 0.15   | 1.32  |
| <b>Tumour stage: Advanced vs Non-advanced</b>                  | 0.97 | 0.36  | 2.65 | 0.55   | 1.72  |
| <b>Tumour stage: Unk vs Non-advanced</b>                       | 0.41 | 0.06  | 2.60 | 0.12   | 1.41  |
| <b>Primary Tumour: GI vs Breast</b>                            | 0.71 | 0.05  | 9.34 | 0.03   | 13.2  |
| <b>Primary Tumour: GU/GY vs Breast</b>                         | 0.99 | 0.07  | 13.1 | 0.07   | 12.2  |
| <b>Primary Tumour: Thoracic vs Breast</b>                      | 4.54 | 0.38  | 53.5 | 0.38   | 53.15 |
| <b>Primary Tumour: Others vs Breast</b>                        | 0.84 | 0.03  | 21.4 | 0.02   | 25.64 |
| <b>Primary Tumour: Haematological vs Breast</b>                | 2.39 | 0.17  | 32.2 | 0.20   | 28.47 |
| <b>SACT at COVID-19: Yes vs No</b>                             | 0.85 | 0.27  | 2.68 | 0.46   | 1.56  |
| <b>SACT at COVID-19: Unk vs No</b>                             | 1.61 | 0.43  | 5.93 | 0.39   | 6.50  |

**Supplementary Table 5.** Summary of vaccine type administered according to vaccination category among the study population.

| SARS-CoV-2 vaccinations |                               |                       |                  |
|-------------------------|-------------------------------|-----------------------|------------------|
|                         | Partially vaccinated<br>N (%) | Double-dosed<br>N (%) | Boosted<br>N (%) |
| <b>BNT162b2</b>         | 23 (35.4)                     | 77 (42.1)             | 67 (49.3)        |
| <b>mRNA-1273</b>        | 17 (26.2)                     | 40 (21.9)             | 36 (26.5)        |
| <b>Ad.26.COV2.S</b>     | -                             | 4 (2.2)               | 1 (0.7)          |
| <b>ChAdOx1-S</b>        | 12 (18.5)                     | 39 (21.3)             | 24 (17.6)        |
| <b>Not specified</b>    | 13 (20.0)                     | 23 (12.6)             | 8 (5.9)          |
| <b>Total</b>            | 65                            | 183                   | 136              |

**Supplementary Table 6.** Distribution of baseline patients, tumour and COVID-19 characteristics among the vaccinated (including both patients who received 2 vaccinal doses and a booster dose) and unvaccinated patients (including partially vaccinated patients) prior to COVID-19. SACT: systemic anticancer therapy.

|                                            | <b>Unvaccinated patients</b> | <b>Vaccinated patients</b> | <b>P value</b> |
|--------------------------------------------|------------------------------|----------------------------|----------------|
|                                            | <b>N = 1489 (%)</b>          | <b>N = 319 (%)</b>         |                |
| <b>Country</b>                             |                              |                            |                |
| United Kingdom                             | 520 (34.9)                   | 125 (39.2)                 | 0.018          |
| Spain                                      | 556 (37.3)                   | 130 (40.8)                 |                |
| Italy                                      | 413 (27.7)                   | 64 (20.1)                  |                |
| <b>Sex</b>                                 |                              |                            |                |
| Male                                       | 728 (49.1)                   | 160 (50.3)                 | 0.69           |
| Females                                    | 755 (50.9)                   | 158 (49.7)                 |                |
| Missing                                    | 6                            | 1                          |                |
| <b>Age</b>                                 |                              |                            |                |
| <65 years                                  | 694 (46.9)                   | 153 (48.7)                 | 0.54           |
| ≥65 years                                  | 787 (53.1)                   | 161 (51.3)                 |                |
| Missing                                    | 8                            | 5                          |                |
| <b>Comorbidities</b>                       |                              |                            |                |
| 0-1                                        | 890 (59.8)                   | 183 (57.4)                 | 0.42           |
| ≥2                                         | 599 (40.2)                   | 136 (42.6)                 |                |
| <b>Smoking history</b>                     |                              |                            |                |
| Never smokers                              | 654 (51.9)                   | 113 (43.3)                 | 0.011          |
| Former/current smokers                     | 606 (48.1)                   | 148 (56.7)                 |                |
| Missing                                    | 229                          | 58                         |                |
| <b>Primary Tumour</b>                      |                              |                            |                |
| Breast                                     | 280 (19.0)                   | 51 (16.1)                  | 0.063          |
| Gastrointestinal                           | 370 (25.1)                   | 74 (23.3)                  |                |
| Gynaecological/Genito-Urinary              | 281 (19.0)                   | 48 (15.1)                  |                |
| Thoracic                                   | 192 (13.0)                   | 59 (18.6)                  |                |
| Others                                     | 101 (6.8)                    | 23 (7.3)                   |                |
| Haematological                             | 253 (17.1)                   | 62 (19.6)                  |                |
| Missing                                    | 12                           | 2                          |                |
| <b>Tumour stage</b>                        |                              |                            |                |
| Local/loco-regional                        | 666 (51.8)                   | 110 (38.1)                 | <0.0001        |
| Advanced                                   | 619 (48.2)                   | 179 (61.9)                 |                |
| Missing                                    | 204                          | 30                         |                |
| <b>Tumour status at COVID-19 diagnosis</b> |                              |                            |                |
| Remission/non measurable disease           | 702 (47.5)                   | 116 (36.5)                 | 0.0003         |
| Active malignancy                          | 775 (52.5)                   | 202 (63.5)                 |                |
| Missing                                    | 12                           | 1                          |                |
| <b>SACT at COVID-19 diagnosis</b>          |                              |                            |                |
| No                                         | 795 (56.2)                   | 125 (42.1)                 | <0.0001        |
| Yes                                        | 619 (43.8)                   | 172 (57.9)                 |                |
| Missing                                    | 75                           | 22                         |                |



**Supplementary Table 7:** Distribution of baseline characteristics before and after the IPTW procedure between vaccinated (including both patients who received 2 vaccinal doses and a booster dose) and unvaccinated patients (including partially vaccinated patients). Variability of included characteristics is estimated through the standardized mean difference (SMD). SACT: systemic anticancer therapy; Gy: gynecological; Gu: genito-urinary.

|                           | Unvaccinated (%) | Vaccinated (%) | P value | SMD  | Unvaccinated Weighted (%) | Vaccinated Weighted (%) | P value | SMD Weighted |
|---------------------------|------------------|----------------|---------|------|---------------------------|-------------------------|---------|--------------|
| <b>Country</b>            |                  |                |         |      |                           |                         |         |              |
| United Kingdom            | 34.9             | 39.2           | 0.018   | 0.18 | 35.8                      | 37.6                    | 0.63    | 0.06         |
| Spain                     | 37.3             | 40.8           |         |      | <b>37.9</b>               | <b>38.7</b>             |         |              |
| Italy                     | 27.7             | 20.1           |         |      | <b>26.3</b>               | <b>23.7</b>             |         |              |
| <b>Sex</b>                |                  |                |         |      |                           |                         |         |              |
| Male                      | 50.7             | 49.5           | 0.74    | 0.02 | 50.4                      | 49.8                    | 0.85    | 0.01         |
| <b>Age</b>                |                  |                |         |      |                           |                         |         |              |
| ≥65 years                 | 52.9             | 50.5           | 0.47    | 0.04 | 52.4                      | 51.9                    | 0.88    | 0.01         |
| <b>Comorbidities</b>      |                  |                |         |      |                           |                         |         |              |
| ≥2                        | 40.2             | 42.6           | 0.46    | 0.05 | 40.6                      | 40.3                    | 0.924   | 0.01         |
| <b>Status at COVID-19</b> |                  |                |         |      |                           |                         |         |              |
| Active malignancy         | 55.0             | 53.6           | 0.69    | 0.02 | 54.8                      | 55.2                    | 0.91    | 0.01         |
| <b>Tumour stage</b>       |                  |                |         |      |                           |                         |         |              |
| Non-advanced              | 42.3             | 45.8           | 0.24    | 0.13 | 42.9                      | 43.1                    | 0.85    | 0.03         |
| Advanced                  | 44.5             | 44.2           |         |      | 44.5                      | 45.4                    |         |              |
| Unknown                   | 13.2             | 20.1           |         |      | 12.6                      | 11.4                    |         |              |
| <b>SACT at COVID-19</b>   |                  |                |         |      |                           |                         |         |              |
| No                        | 53.4             | 39.2           | <0.001  | 0.28 | 50.8                      | 48.8                    | 0.78    | 0.04         |
| Yes                       | 41.6             | 53.9           |         |      | 43.8                      | 45.3                    |         |              |
| Unknown                   | 5.0              | 6.9            |         |      | 5.4                       | 5.9                     |         |              |
| <b>Primary tumour</b>     |                  |                |         |      |                           |                         |         |              |
| Breast                    | 20.0             | 15.7           | 0.096   | 0.18 | 19.2                      | 18.3                    | 0.99    | 0.04         |
| Gastrointestinal          | 24.4             | 24.1           |         |      | 24.4                      | 24.0                    |         |              |
| Gy-Gu                     | 17.9             | 17.2           |         |      | 17.8                      | 19.0                    |         |              |
| Thoracic                  | 14.3             | 16.3           |         |      | 14.7                      | 15.4                    |         |              |
| Others                    | 6.1              | 10.0           |         |      | 6.8                       | 6.8                     |         |              |
| Haematological            | 17.3             | 16.6           |         |      | 17.1                      | 16.5                    |         |              |

**Supplementary Table 8:** Distribution of baseline characteristics before and after the IPTW procedure between patients who received two SARS-CoV-2 vaccinal doses prior to COVID-19 and unvaccinated patients (including partially vaccinated patients). Variability of included characteristics is estimated through the standardized mean difference (SMD). SACT: systemic anticancer therapy; Gy: gynecological; Gu: genito-urinary.

|                           | Unvaccinated (%) | Vaccinated (%) | P value | SMD  | Unvaccinated Weighted (%) | Vaccinated Weighted (%) | P value | SMD Weighted |
|---------------------------|------------------|----------------|---------|------|---------------------------|-------------------------|---------|--------------|
| <b>Country</b>            |                  |                |         |      |                           |                         |         |              |
| United Kingdom            | 34.9             | 48.6           | <0.001  | 0.42 | 36.5                      | 38.1                    | 0.89    | 0.04         |
| Spain                     | 37.3             | 39.3           |         |      | 37.5                      | 37.3                    |         |              |
| Italy                     | 27.7             | 12.0           |         |      | 26.0                      | 24.5                    |         |              |
| <b>Sex</b>                |                  |                |         |      |                           |                         |         |              |
| Male                      | 50.7             | 48.6           | 0.65    | 0.04 | 50.4                      | 49.3                    | 0.80    | 0.02         |
| <b>Age</b>                |                  |                |         |      |                           |                         |         |              |
| ≥65 years                 | 52.9             | 49.2           | 0.38    | 0.07 | 52.4                      | 50.0                    | 0.58    | 0.04         |
| <b>Comorbidities</b>      |                  |                |         |      |                           |                         |         |              |
| ≥2                        | 40.2             | 43.7           | 0.41    | 0.07 | 40.6                      | 38.4                    | 0.59    | 0.04         |
| <b>Status at COVID-19</b> |                  |                |         |      |                           |                         |         |              |
| Active malignancy         | 55.0             | 54.1           | 0.87    | 0.02 | 54.9                      | 54.0                    | 0.84    | 0.02         |
| <b>Tumour stage</b>       |                  |                |         |      |                           |                         |         |              |
| Non-advanced              | 42.3             | 51.4           | 0.041   | 0.20 | 43.3                      | 43.8                    | 0.55    | 0.09         |
| Advanced                  | 44.5             | 39.9           |         |      | 44.0                      | 46.5                    |         |              |
| Unknown                   | 13.2             | 8.7            |         |      | 12.7                      | 9.7                     |         |              |
| <b>SACT at COVID-19</b>   |                  |                |         |      |                           |                         |         |              |
| No                        | 53.4             | 43.7           | 0.039   | 0.19 | 52.3                      | 49.5                    | 0.76    | 0.06         |
| Yes                       | 41.6             | 49.2           |         |      | 42.5                      | 45.3                    |         |              |
| Unknown                   | 5.0              | 7.1            |         |      | 5.3                       | 5.2                     |         |              |
| <b>Primary tumour</b>     |                  |                |         |      |                           |                         |         |              |
| Breast                    | 20.0             | 17.5           | 0.010   | 0.26 | 19.7                      | 18.9                    | 0.99    | 0.04         |
| Gastrointestinal          | 24.4             | 24.6           |         |      | 24.5                      | 24.8                    |         |              |
| Gy-Gu                     | 17.9             | 16.9           |         |      | 17.8                      | 17.9                    |         |              |
| Thoracic                  | 14.3             | 13.1           |         |      | 14.2                      | 15.4                    |         |              |
| Others                    | 6.1              | 13.7           |         |      | 7.0                       | 7.1                     |         |              |
| Haematological            | 17.3             | 14.2           |         |      | 16.9                      | 15.9                    |         |              |

**Supplementary Table 9:** Distribution of baseline characteristics before and after the IPTW procedure between patients who received a SARS-CoV-2 vaccine booster dose prior to COVID-19 and unvaccinated patients (including partially vaccinated patients). Variability of included characteristics is estimated through the standardized mean difference (SMD). SACT: systemic anticancer therapy; Gy: gynecological; Gu: genito-urinary.

|                           | Unvaccinated (%) | Vaccinated (%) | P value | SMD  | Unvaccinated Weighted (%) | Vaccinated Weighted (%) | P value | SMD Weighted |
|---------------------------|------------------|----------------|---------|------|---------------------------|-------------------------|---------|--------------|
| <b>Country</b>            |                  |                |         |      |                           |                         |         |              |
| United Kingdom            | 34.9             | 26.5           | 0.13    | 0.18 | 34.2                      | 37.7                    | 0.32    | 0.14         |
| Spain                     | 37.3             | 42.6           |         |      | 37.8                      | 40.5                    |         |              |
| Italy                     | 27.7             | 30.9           |         |      | 28.0                      | 21.7                    |         |              |
| <b>Sex</b>                |                  |                |         |      |                           |                         |         |              |
| Male                      | 50.7             | 50.7           | 1.00    | 0.00 | 50.7                      | 49.7                    | 0.84    | 0.02         |
| <b>Age</b>                |                  |                |         |      |                           |                         |         |              |
| ≥65 years                 | 52.9             | 52.2           | 0.95    | 0.01 | 52.8                      | 50.1                    | 0.60    | 0.06         |
| <b>Comorbidities</b>      |                  |                |         |      |                           |                         |         |              |
| ≥2                        | 40.2             | 41.2           | 0.90    | 0.02 | 40.3                      | 39.0                    | 0.79    | 0.02         |
| <b>Status at COVID-19</b> |                  |                |         |      |                           |                         |         |              |
| Active malignancy         | 55.0             | 53.6           | 0.69    | 0.02 | 54.9                      | 57.8                    | 0.55    | 0.06         |
| <b>Tumour stage</b>       |                  |                |         |      |                           |                         |         |              |
| Non-advanced              | 42.3             | 38.2           | 0.47    | 0.11 | 42.0                      | 43.1                    | 0.78    | 0.07         |
| Advanced                  | 44.5             | 50.0           |         |      | 45.0                      | 46.2                    |         |              |
| Unknown                   | 13.2             | 11.8           |         |      | 13.0                      | 10.7                    |         |              |
| <b>SACT at COVID-19</b>   |                  |                |         |      |                           |                         |         |              |
| No                        | 53.4             | 33.1           | <0.001  | 0.42 | 51.7                      | 53.2                    | 0.94    | 0.02         |
| Yes                       | 41.6             | 60.3           |         |      | 43.1                      | 41.8                    |         |              |
| Unknown                   | 5.0              | 6.6            |         |      | 5.2                       | 5.0                     |         |              |
| <b>Primary tumour</b>     |                  |                |         |      |                           |                         |         |              |
| Breast                    | 20.0             | 13.2           | 0.22    | 0.23 | 19.5                      | 20.9                    | 0.99    | 0.07         |
| Gastrointestinal          | 24.4             | 23.5           |         |      | 24.4                      | 22.7                    |         |              |
| Gy-Gu                     | 17.9             | 17.6           |         |      | 17.9                      | 19.5                    |         |              |
| Thoracic                  | 14.3             | 20.6           |         |      | 14.8                      | 14.0                    |         |              |
| Others                    | 6.1              | 5.1            |         |      | 6.0                       | 6.3                     |         |              |
| Haematological            | 17.3             | 19.9           |         |      | 17.5                      | 16.6                    |         |              |

**Supplementary Table 10:** Inverse Probability of Treatment Weighting (IPTW) fitted multivariable logistic regression model for COVID-19 sequelae comparing patients who received a SARS-CoV-2 vaccine booster dose prior to COVID-19 and unvaccinated patients (including partially vaccinated patients). Country was included as covariate because of the >0.10 SMD at the IPTW. \*Clustered robust correction of 95%CI for participating centre. SACT: systemic anticancer therapy; UK: United Kingdom; Unk: unknown; aOR: adjusted odds ratio; CI: confidence intervals; SMD: standardized mean difference.

| COVID-19 sequelae                                                  | aOR  | 95%CI |      | 95%CI* |      |
|--------------------------------------------------------------------|------|-------|------|--------|------|
| <b>SARS-CoV-2 vaccination status: Booster dose vs Unvaccinated</b> | 0.47 | 0.35  | 0.35 | 0.18   | 1.18 |
| <b>Country: Italy vs UK</b>                                        | 0.61 | 0.45  | 0.45 | 0.25   | 1.50 |
| <b>Country: Spain vs UK</b>                                        | 0.33 | 0.22  | 0.22 | 0.13   | 0.81 |

**Supplementary Table 11:** Restricted mean survival time (RMST) analysis of post COVID-19 survival at 2-, 4- and 6-months reporting difference in months according to key covariates. SACT: systemic anticancer therapy.

|                                                       | 2 months<br>Univariable model    |         | 4 months<br>Univariable model    |         | 6 months<br>Univariable model    |         |
|-------------------------------------------------------|----------------------------------|---------|----------------------------------|---------|----------------------------------|---------|
|                                                       | RMST difference<br>days (95% CI) | p-value | RMST difference<br>days (95% CI) | p-value | RMST difference<br>days (95% CI) | p-value |
| <b>COVID-19 sequelae</b>                              |                                  |         |                                  |         |                                  |         |
| Yes vs No                                             | -0.13 (-0.21 / -0.06)            | <0.001  | -0.34 (-0.52 / -0.16)            | <0.001  | -0.54 (-0.83 / -0.25)            | <0.001  |
| <b>Vaccination status</b>                             |                                  |         |                                  |         |                                  |         |
| Vaccinated vs Unvaccinated                            | -0.03 (-0.09 / 0.02)             | 0.27    | -0.12 (-0.29 / 0.04)             | 0.13    | -0.34 (-0.62 / -0.05)            | 0.020   |
| <b>Country</b>                                        |                                  |         |                                  |         |                                  |         |
| Spain vs UK                                           | 0.01 (-0.04 / 0.07)              | 0.58    | 0.04 (-0.09 / 0.19)              | 0.53    | 0.13 (-0.11 / 0.38)              | 0.26    |
| Italy vs UK                                           | 0.07 (0.02 / 0.13)               | 0.007   | 0.22 (0.08 / 0.36)               | 0.002   | 0.46 (0.22 / 0.71)               | <0.001  |
| <b>Sex</b>                                            |                                  |         |                                  |         |                                  |         |
| Males vs Females                                      | -0.04 (-0.08 / 0.01)             | 0.060   | -0.12 (-0.22 / -0.01)            | 0.023   | -0.22 (-0.41 / -0.05)            | 0.013   |
| <b>Age</b>                                            |                                  |         |                                  |         |                                  |         |
| ≥65 vs <65 years                                      | -0.05 (-0.09 / -0.01)            | 0.021   | -0.13 (-0.24 / -0.03)            | 0.012   | -0.27 (-0.45 / -0.08)            | 0.004   |
| <b>Comorbidities</b>                                  |                                  |         |                                  |         |                                  |         |
| ≥2 vs 0-1                                             | -0.05 (-0.10 / -0.01)            | 0.015   | -0.13 (-0.25 / -0.02)            | 0.019   | -0.29 (-0.48 / -0.09)            | 0.003   |
| <b>Primary tumour</b>                                 |                                  |         |                                  |         |                                  |         |
| Breast vs Gastrointestinal                            | 0.03 (-0.02 / 0.09)              | 0.21    | 0.15 (0.01 / 0.31)               | 0.038   | 0.31 (0.06 / 0.57)               | 0.014   |
| Gynaecological/Genito-Urinary vs Gastrointestinal     | -0.09 (-0.17 / -0.01)            | 0.030   | -0.23 (-0.44 / -0.03)            | 0.021   | -0.37 (-0.71 / -0.03)            | 0.029   |
| Thoracic vs Gastrointestinal                          | 0.06 (0.01 / 0.12)               | 0.019   | 0.16 (0.01 / 0.31)               | 0.035   | 0.26 (0.01 / 0.53)               | 0.046   |
| Others vs Gastrointestinal                            | 0.11 (0.08 / 0.15)               | <0.001  | 0.40 (0.30 / 0.30)               | <0.001  | 0.41 (-0.02 / 0.86)              | 0.06    |
| Haematological vs Gastrointestinal                    | 0.01 (-0.06 / 0.07)              | 0.91    | 0.03 (-0.13 / 0.21)              | 0.65    | 0.10 (-0.18 / 0.38)              | 0.48    |
| <b>Tumour stage</b>                                   |                                  |         |                                  |         |                                  |         |
| Advanced vs Local/loco-regional                       | -0.01 (-0.05 / 0.04)             | 0.80    | -0.07 (-0.19 / 0.04)             | 0.19    | -0.13 (-0.33 / 0.05)             | 0.16    |
| <b>Tumour status</b>                                  |                                  |         |                                  |         |                                  |         |
| Active malignancy vs Remission/non measurable disease | -0.02 (-0.06 / 0.02)             | 0.41    | -0.03 (-0.14 / 0.06)             | 0.47    | -0.04 (-0.22 / 0.14)             | 0.64    |
| <b>SACT at COVID-19</b>                               |                                  |         |                                  |         |                                  |         |
| Yes vs No                                             | 0.04 (-0.01 / 0.08)              | 0.063   | 0.09 (-0.08 / 0.20)              | 0.070   | 0.14 (-0.03 / 0.32)              | 0.12    |
| Unkown vs No                                          | -0.08 (-0.21 / 0.05)             | 0.25    | -0.28 (-0.61 / 0.54)             | 0.27    | -0.55 (-1.11 / 0.01)             | 0.050   |

**Supplementary Table 12.** Distribution of baseline patients, tumour and COVID-19 characteristics according to the SACT resumption pathways. Only patients who were on SACT within 4 weeks prior to COVID-19 were included and categorized as those who resumed/continued SACT without changes and those who permanently discontinued SACT/resumed SACT following dose/regimen adjustments. SACT: systemic anticancer therapy.

|                                            | <b>SACT unchanged</b> | <b>SACT adjustments /discontinuations</b> | <b>P value</b> |
|--------------------------------------------|-----------------------|-------------------------------------------|----------------|
|                                            | <b>N=506 (%)</b>      | <b>N=332 (%)</b>                          |                |
| <b>COVID-19 sequelae</b>                   |                       |                                           |                |
| No                                         | 445 (87.9)            | 271 (81.6)                                | 0.011          |
| Yes                                        | 61 (12.1)             | 61 (18.4)                                 |                |
| <b>SARS-CoV-2 vaccination status</b>       |                       |                                           |                |
| No                                         | 365 (77.5)            | 254 (79.4)                                | 0.52           |
| Yes                                        | 106 (22.5)            | 66 (20.6)                                 |                |
| Missing                                    | 35                    | 12                                        |                |
| <b>Country</b>                             |                       |                                           |                |
| United Kingdom                             | 118 (23.3)            | 70 (21.1)                                 | 0.0154         |
| Spain                                      | 191 (37.7)            | 158 (47.6)                                |                |
| Italy                                      | 197 (38.9)            | 104 (31.3)                                |                |
| <b>Sex</b>                                 |                       |                                           |                |
| Male                                       | 279 (55.2)            | 184 (55.8)                                | 0.88           |
| Females                                    | 226 (44.8)            | 146 (44.2)                                |                |
| Missing                                    | 1                     | 2                                         |                |
| <b>Age</b>                                 |                       |                                           |                |
| <65 y                                      | 262 (52.0)            | 169 (51.1)                                | 0.79           |
| ≥65 y                                      | 242 (48.0)            | 162 (48.9)                                |                |
| Missing                                    | 2                     | 1                                         |                |
| <b>Comorbidities</b>                       |                       |                                           |                |
| 0-1                                        | 336 (66.4)            | 226 (68.1)                                | 0.61           |
| ≥2                                         | 170 (33.6)            | 106 (31.9)                                |                |
| <b>Smoking history</b>                     |                       |                                           |                |
| Never smokers                              | 240 (56.9)            | 149 (50.3)                                | 0.083          |
| Former/current smokers                     | 182 (43.1)            | 147 (49.7)                                |                |
| Missing                                    | 84                    | 36                                        |                |
| <b>Primary Tumour</b>                      |                       |                                           |                |
| Breast                                     | 148 (29.4)            | 72 (21.8)                                 | 0.0081         |
| Gastrointestinal                           | 112 (22.3)            | 87 (26.4)                                 |                |
| Gynaecological/Genito-Urinary              | 82 (16.3)             | 41 (12.4)                                 |                |
| Haematological                             | 74 (14.7)             | 51 (15.5)                                 |                |
| Thoracic                                   | 27 (5.4)              | 15 (4.5)                                  |                |
| Others                                     | 60 (11.9)             | 64 (19.4)                                 |                |
| Missing                                    | 3                     | 2                                         |                |
| <b>Tumour stage</b>                        |                       |                                           |                |
| Local/loco-regional                        | 181 (37.2)            | 91 (30.7)                                 | 0.06           |
| Advanced                                   | 306 (62.8)            | 205 (69.3)                                |                |
| Missing                                    | 19                    | 36                                        |                |
| <b>Tumour status at COVID-19 diagnosis</b> |                       |                                           |                |
| Remission/non measurable disease           | 207 (41.0)            | 112 (33.7)                                | 0.034          |
| Active malignancy                          | 298 (59.0)            | 220 (66.3)                                |                |
| Missing                                    | 1                     | 0                                         |                |
| <b>COVID-19 therapy</b>                    |                       |                                           |                |
| No                                         | 270 (57.2)            | 143 (45.5)                                | 0.0014         |
| Yes                                        | 202 (42.8)            | 171 (54.5)                                |                |
| Missing                                    | 34                    | 18                                        |                |
| <b>Oxygen therapy requirement</b>          |                       |                                           |                |
| No                                         | 348 (73.6)            | 205 (64.9)                                | 0.0090         |
| Yes                                        | 125 (26.4)            | 111 (35.1)                                |                |
| Missing                                    | 33                    | 16                                        |                |
| <b>Complicated COVID-19</b>                |                       |                                           |                |
| 0                                          | 417 (82.4)            | 238 (71.7)                                | 0.0002         |
| ≥ 1                                        | 89 (17.6)             | 94 (28.3)                                 |                |
| <b>Hospitalization</b>                     |                       |                                           |                |
| Not required                               | 246 (48.8)            | 116 (35.2)                                | 0.0005         |
| Required                                   | 184 (36.5)            | 149 (45.2)                                |                |
| Pre-existing                               | 74 (14.7)             | 65 (19.7)                                 |                |
| Missing                                    | 2                     | 2                                         |                |

**Supplementary Figure 1.** Kaplan-Meier survival estimate for post COVID-19 survival according to the experience of COVID-19 sequelae. Patients who did not experienced sequelae: not reached (316 events); patients who experienced COVID-19 sequelae: 17.2 months (95%CI: 14.1-NA; 241 events). Log-rank:  $p < 0.0001$ ; HR: 1.61 (95%CI: 1.28-2.01). HR: hazard ratio; CI: confidence intervals.

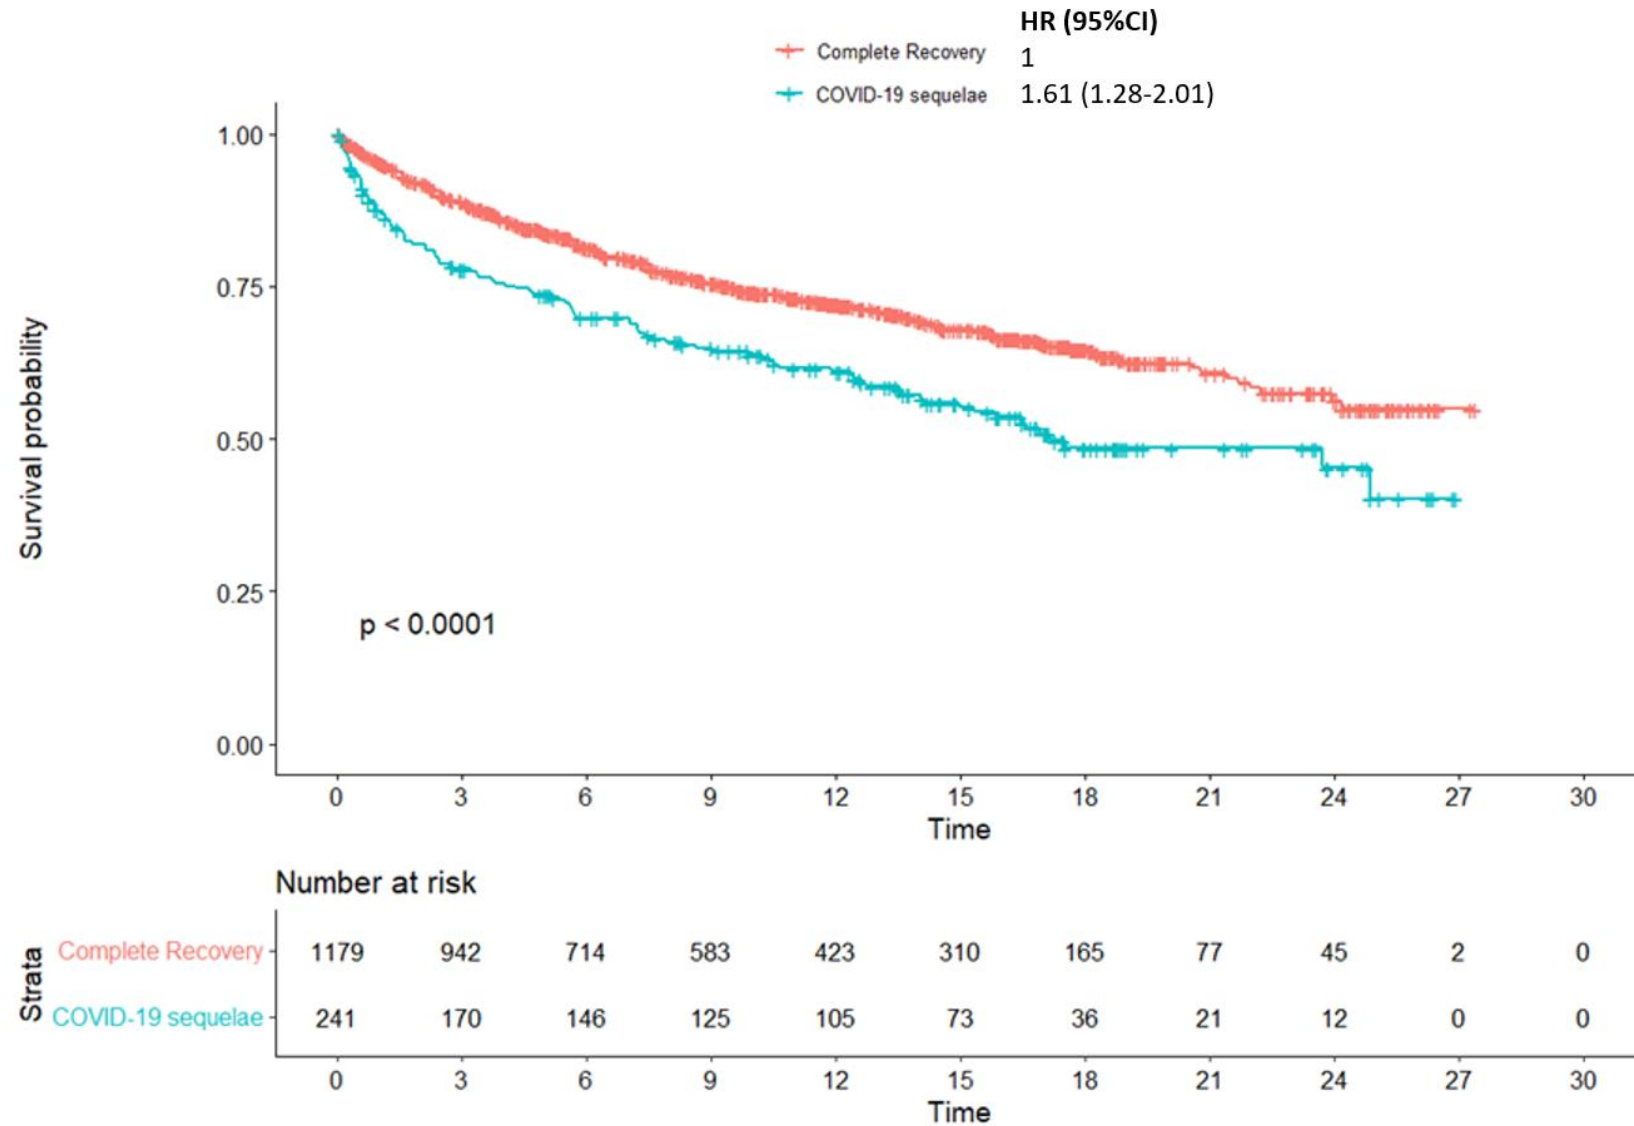

**Supplementary Figure 2.** Kaplan-Meier survival estimate for post COVID-19 survival according to SACT resumption pathways. Only patients on SACT within 4 weeks prior to COVID-19 diagnosis were included. Patients who continued/resumed SACT without changes: not reached (86 events); patients who resumed SACT following dose/regimen adjustments: not reached (62 events); patients who permanently discontinued SACT: 4.7 months (95%CI: 2.5-17.5; 42 events). Log-rank:  $p < 0.0001$ ; HR for the risk of death (unchanged group set as reference): dose/regimen adjustments: HR=0.92 (95%CI: 0.71-1.21), permanent discontinuation: HR=3.17 (95%CI: 2.29-4.38). HR: hazard ratio; CI: confidence intervals; cessation: permanent discontinuation.

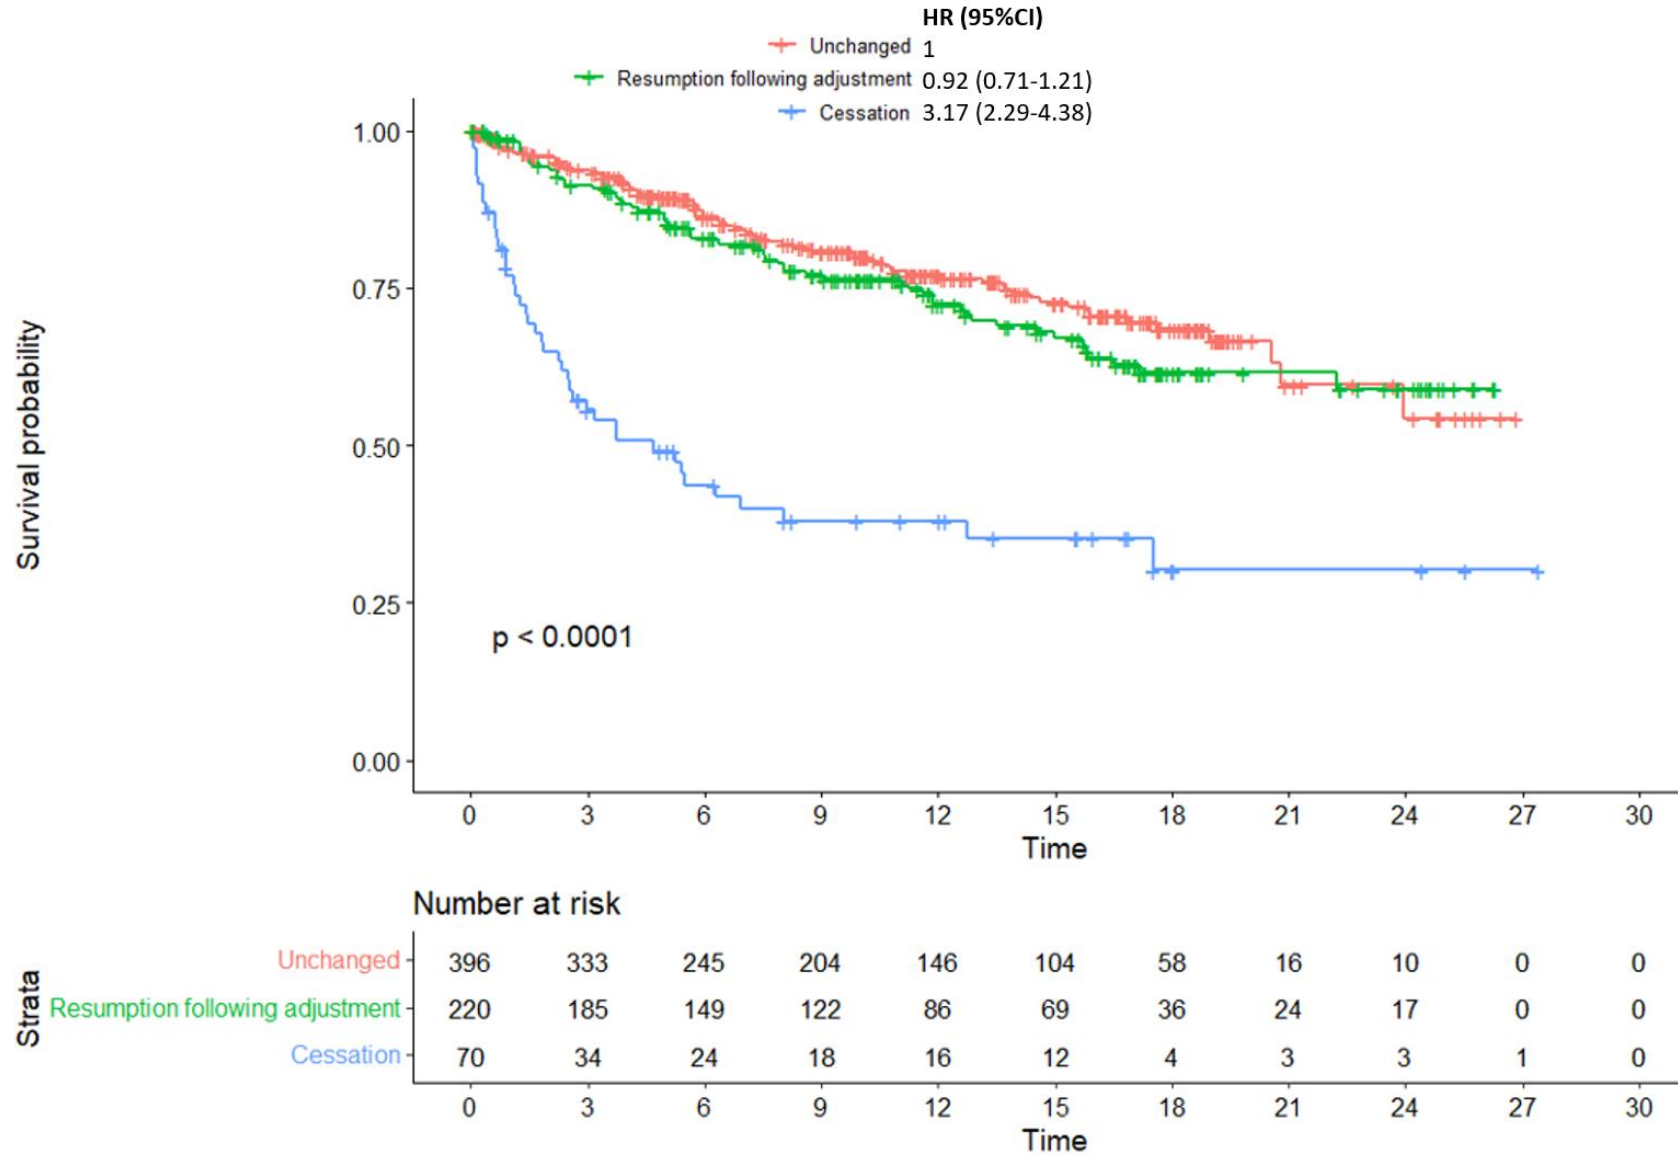

Supplement: mmc1.pdf [file mmc1.pdf]
